# Supplementary material for: A Deep-Learning Pipeline for TSS Coverage Imputation From Shallow Cell-Free DNA Sequencing
Source: Front Med (Lausanne). 2021 Dec 3;8:684238. doi: 10.3389/fmed.2021.684238 (PMC8678047; doi:10.3389/fmed.2021.684238)
Supplement: Supplementary file 2 [file Table_2.XLSX]

## Sheet: Figure 2
Figure 2A
Meidian Correlation	1M	2M	3M	4M	8M	16M
Raw	0.375	0.518	0.606	0.693	0.798	0.883
AECT	0.496	0.637	0.713	0.785	0.888	0.901
Figure 2B
Meidian MSE	1M	2M	3M	4M	8M	16M
Raw	0.176	0.127	0.103	0.089	0.063	0.045
AECT	0.123	0.087	0.075	0.06	0.045	0.04
Figure 2C
Meidian Correlation	1M	2M	3M	4M	8M	16M
with healthy donor	0.553	0.687	0.746	0.776	0.83	0.819
with other cancer	0.45	0.557	0.63	0.702	0.806	0.78
with the same sample	0.496	0.637	0.713	0.785	0.888	0.901
Figure 2D
Meidian MSE	1M	2M	3M	4M	8M	16M
with healthy donor	0.133	0.108	0.099	0.099	0.086	0.057
with other cancer	0.128	0.096	0.085	0.075	0.062	0.055
with the same sample	0.123	0.087	0.075	0.06	0.045	0.04

## Sheet: Figure 3
Figure 3C
	Raw	AECT	MAGIC	DCA	DeepImpute	SCALE
[0.5,0.6]	0.926	0.734	0.247	0.809	0.909	0.132
(0.6,0.7]	0.074	0.241	0.289	0.191	0.091	0.868
(0.7,0.8]	0	0.024	0.247	0	0	0
(0.8,0.9]	0	0.001	0.185	0	0	0
(0.9,1]	0	0	0.033	0	0	0
Figure 3D
	Raw	AECT	MAGIC	DCA	DeepImpute	SCALE
(-1,-0.9]	0	0	36.713	0	0	0.381
(-0.9,-0.8]	0	0	3.121	0	0	0.351
(-0.8,-0.7]	0	0	1.555	0	0	0.43
(-0.7,-0.6]	0	0	1.195	0	0	0.526
(-0.6,-0.5]	0	0.002	0.923	0	0	0.61
(-0.5,-0.4]	0	0.036	0.773	0.013	0	0.765
(-0.4,-0.3]	0	0.309	0.688	0.125	0	0.903
(-0.3,-0.2]	0.057	1.509	0.658	0.742	0.008	1.036
(-0.2,-0.1]	2.952	4.849	0.622	2.841	1.368	1.196
(-0.1,0]	25.243	10.944	0.554	7.548	20.116	1.356
(0,0.1]	46.44	18.199	0.531	14.828	45.388	1.564
(0.1,0.2]	22.258	22.468	0.625	21.498	27.351	1.8
(0.2,0.3]	2.918	20.513	0.705	23.081	5.34	2.104
(0.3,0.4]	0.122	13.459	0.743	17.519	0.395	2.563
(0.4,0.5]	0.007	5.928	0.809	8.827	0.025	3.196
(0.5,0.6]	0.001	1.56	0.959	2.596	0.006	4.18
(0.6,0.7]	0.001	0.208	1.212	0.364	0.002	5.724
(0.7,0.8]	0	0.012	1.662	0.015	0.001	8.49
(0.8,0.9]	0	0.001	3.133	0	0.001	14.537
(0.9,1]	0.001	0.002	42.818	0.002	0.001	48.287

## Sheet: Figure 4
Figure 4A
	Raw	AECT	MAGIC	DCA	DeepImpute	SCALE
[0.5,0.6]	0.974	0.823	0.258	0.786	0.978	0.216
(0.6,0.7]	0.026	0.175	0.741	0.211	0.022	0.784
(0.7,0.8]	0	0.002	0.001	0.004	0	0.001
(0.8,0.9]	0	0	0	0	0	0
(0.9,1]	0	0	0	0	0	0
Figure 4B
	Raw	AECT	MAGIC	DCA	DeepImpute	SCALE
(-1,-0.9]	0	0	43.475	0	0	0.024
(-0.9,-0.8]	0	0	1.295	0	0	0.174
(-0.8,-0.7]	0	0	0.484	0	0	0.446
(-0.7,-0.6]	0	0.011	0.412	0	0	0.838
(-0.6,-0.5]	0	0.146	0.217	0	0	1.258
(-0.5,-0.4]	0	0.893	0.393	0.024	0	1.748
(-0.4,-0.3]	0	3.294	0.187	0.381	0	2.285
(-0.3,-0.2]	0.159	8.079	0.201	2.621	0.099	2.887
(-0.2,-0.1]	7.435	14.265	0.194	9.363	6.793	3.492
(-0.1,0]	43.291	19.19	0.273	19.652	43.774	4.09
(0,0.1]	40.977	20.047	0.219	26.036	40.698	4.729
(0.1,0.2]	7.752	16.402	0.154	22.575	8.082	5.418
(0.2,0.3]	0.363	10.43	0.22	13.042	0.51	6.087
(0.3,0.4]	0.016	5.021	0.192	4.918	0.033	6.85
(0.4,0.5]	0.003	1.749	0.333	1.202	0.007	7.629
(0.5,0.6]	0.001	0.408	0.257	0.17	0.002	8.57
(0.6,0.7]	0	0.055	0.39	0.014	0.001	9.866
(0.7,0.8]	0	0.005	0.45	0.001	0.001	11.514
(0.8,0.9]	0	0.001	1.19	0	0.001	13.112
(0.9,1]	0.001	0.001	49.466	0.001	0	8.983

## Sheet: Figure 5
Figure 5A
	Raw	AECT	MAGIC	DCA	DeepImpute	SCALE
[0.5,0.6]	0.967	0.904	0.043	0.827	0.97	0.254
(0.6,0.7]	0.033	0.096	0.957	0.172	0.03	0.746
(0.7,0.8]	0	0	0	0.001	0	0
(0.8,0.9]	0	0	0	0	0	0
(0.9,1]	0	0	0	0	0	0
Figure 5C
	Raw	AECT	MAGIC	DCA	DeepImpute	SCALE
(-1,-0.9]	0	0	31.81	0	0	0.003
(-0.9,-0.8]	0	0	4.189	0	0	0.037
(-0.8,-0.7]	0	0.001	2.161	0	0	0.106
(-0.7,-0.6]	0	0.025	1.414	0.001	0	0.217
(-0.6,-0.5]	0	0.267	1.069	0.025	0	0.365
(-0.5,-0.4]	0	1.37	0.841	0.303	0	0.557
(-0.4,-0.3]	0.001	4.35	0.75	1.824	0	0.808
(-0.3,-0.2]	0.279	9.453	0.723	6.167	0.16	1.139
(-0.2,-0.1]	8.775	15.131	0.72	13.582	7.69	1.545
(-0.1,0]	42.027	18.816	0.702	20.601	42.378	2.011
(0,0.1]	39.164	18.674	0.682	22.521	39.129	2.628
(0.1,0.2]	9.005	14.907	0.704	18.193	9.568	3.34
(0.2,0.3]	0.675	9.535	0.717	10.692	0.941	4.292
(0.3,0.4]	0.051	4.83	0.787	4.517	0.096	5.538
(0.4,0.5]	0.011	1.878	0.923	1.301	0.021	7.152
(0.5,0.6]	0.005	0.568	1.149	0.243	0.008	9.29
(0.6,0.7]	0.002	0.139	1.448	0.026	0.004	12.169
(0.7,0.8]	0.001	0.035	2.293	0.002	0.003	15.962
(0.8,0.9]	0.001	0.013	4.796	0.001	0.001	20.002
(0.9,1]	0.001	0.009	42.122	0.001	0	12.838

## Sheet: Figure 6
Figure 6A
	Raw	AECT
Meidan AUC	0.847	0.909
Figure 6C
	Raw	AECT
Meidan AUC	0.823	0.874

## Sheet: Figure S2
Figure S2A
Meidian Correlation	1M	2M	3M	4M	8M	16M
Raw	0.577	0.713	0.794	0.835	0.903	0.94
AECT	0.658	0.813	0.876	0.898	0.941	0.956
Figure S2B
Meidian MSE	1M	2M	3M	4M	8M	16M
Raw	0.177	0.136	0.114	0.103	0.079	0.062
AECT	0.118	0.086	0.074	0.071	0.057	0.028
Figure S2C
Meidian Correlation	1M	2M	3M	4M	8M	16M
with healthy donor	0.487	0.604	0.681	0.759	0.864	0.84
with other cancer	0.647	0.795	0.855	0.882	0.928	0.939
with the same sample	0.658	0.813	0.876	0.898	0.941	0.956
Figure S2D
Meidian MSE	1M	2M	3M	4M	8M	16M
with healthy donor	0.128	0.095	0.082	0.071	0.054	0.058
with other cancer	0.121	0.091	0.077	0.078	0.058	0.038
with the same sample	0.118	0.086	0.074	0.071	0.057	0.028

## Sheet: Figure S3
Figure S3A
Median Correlation	1M	2M	3M	4M	8M	16M		Median MSE	1M	2M	3M	4M	8M	16M
with healthy donor	0.461934	0.57418	0.641196	0.681433	0.763755	0.80542		with healthy donor	0.19137	0.158113	0.136025	0.131931	0.108729	0.0953793
with other cancer	0.333713	0.463572	0.541472	0.626269	0.721297	0.796305		with other cancer	0.182462	0.135467	0.114282	0.101174	0.0781113	0.0634995
with the same sample	0.374517	0.518141	0.606388	0.692504	0.798121	0.883329		with the same sample	0.175705	0.1266	0.103274	0.0889449	0.0625559	0.0445054
Figure S3B
Median Correlation	1M	2M	3M	4M	8M	16M		Median MSE	1M	2M	3M	4M	8M	16M
with healthy donor	0.663258	0.676157	0.695082	0.716177	0.757865	0.71515		with healthy donor	0.0593493	0.0605325	0.0612698	0.0616609	0.0624573	0.0628692
with other cancer	0.663258	0.676157	0.695082	0.71618	0.759537	0.742441		with other cancer	0.0593493	0.0605325	0.0612698	0.0616609	0.0624798	0.0642006
with the same sample	0.663258	0.676157	0.695082	0.71618	0.759821	0.839514		with the same sample	0.0593493	0.0605325	0.0612698	0.0616609	0.062469	0.0619612
Figure S3C
Median Correlation	1M	2M	3M	4M	8M	16M		Median MSE	1M	2M	3M	4M	8M	16M
with healthy donor	0.744378	0.726364	0.741073	0.757688	0.811462	0.858826		with healthy donor	0.104146	0.102538	0.113098	0.102723	0.0882562	0.05816
with other cancer	0.77819	0.749853	0.760038	0.758291	0.819861	0.890113		with other cancer	0.0806989	0.0687121	0.0733779	0.0687269	0.0599807	0.0415842
with the same sample	0.807424	0.825619	0.829046	0.844743	0.913891	0.970882		with the same sample	0.0742788	0.0545569	0.0580829	0.0517031	0.0373364	0.0226604
Figure S3D
Median Correlation	1M	2M	3M	4M	8M	16M		Median MSE	1M	2M	3M	4M	8M	16M
with healthy donor	0.469666	0.637515	0.693717	0.726656	0.793671	0.81786		with healthy donor	0.114882	0.0823599	0.0791384	0.083816	0.0825596	0.0848956
with other cancer	0.363312	0.57365	0.656056	0.715912	0.78776	0.824536		with other cancer	0.114982	0.0778528	0.0707499	0.0666933	0.0590411	0.0563142
with the same sample	0.392276	0.609575	0.69759	0.764801	0.848219	0.903021		with the same sample	0.109979	0.0681194	0.0599774	0.0549642	0.0438252	0.0364113
Figure S3E
Median Correlation	1M	2M	3M	4M	8M	16M		Median MSE	1M	2M	3M	4M	8M	16M
with healthy donor	0.825065	0.834131	0.854744	0.854834	0.878694	0.288967		with healthy donor	0.057692	0.0584986	0.0614843	0.0608236	0.0520184	0.165274
with other cancer	0.824936	0.835748	0.849839	0.85578	0.879996	0.582369		with other cancer	0.058982	0.0586902	0.0607156	0.0611576	0.0518232	0.147698
with the same sample	0.823734	0.835795	0.849763	0.855794	0.878968	0.582369		with the same sample	0.0591428	0.0601685	0.0593508	0.0616229	0.0520993	0.147698

## Sheet: Figure S4
Figure S4A
Median Correlation	1M	2M	3M	4M	8M	16M		Median MSE	1M	2M	3M	4M	8M	16M
with cancer	0.346942	0.48472	0.562816	0.611769	0.716606	0.782798		with cancer	0.182996	0.134484	0.113514	0.100343	0.0786449	0.0666365
with other healthy donor	0.549569	0.69175	0.75189	0.793346	0.863126	0.897886		with other healthy donor	0.17941	0.139331	0.113489	0.111753	0.0839646	0.0722684
with the same sample	0.576922	0.71302	0.794181	0.834918	0.903166	0.940215		with the same sample	0.176664	0.135796	0.114492	0.103007	0.0790937	0.0615402
Figure S4B
Median Correlation	1M	2M	3M	4M	8M	16M		Median MSE	1M	2M	3M	4M	8M	16M
with cancer	0.728552	0.752257	0.767479	0.781654	0.811965	0.763039		with cancer	0.0755397	0.077797	0.0794738	0.0805276	0.0822944	0.0850227
with other healthy donor	0.728552	0.752257	0.767479	0.781655	0.812593	0.824476		with other healthy donor	0.0755397	0.077797	0.0794738	0.0805275	0.0822052	0.0808765
with the same sample	0.728552	0.752257	0.767479	0.781655	0.812741	0.828552		with the same sample	0.0755397	0.077797	0.0794738	0.0805274	0.0822019	0.0807721
Figure S4C
Median Correlation	1M	2M	3M	4M	8M	16M		Median MSE	1M	2M	3M	4M	8M	16M
with cancer	0.832173	0.78634	0.774806	0.762816	0.804483	0.893638		with cancer	0.0709026	0.0682057	0.0707223	0.068795	0.0613343	0.0453942
with other healthy donor	0.863747	0.875262	0.868949	0.87936	0.912071	0.956512		with other healthy donor	0.0765328	0.0740495	0.078954	0.0738432	0.0624225	0.0322828
with the same sample	0.878943	0.895608	0.904733	0.914062	0.946366	0.977134		with the same sample	0.0764821	0.0726801	0.0771838	0.0699318	0.0553838	0.0241746
Figure S4D
Median Correlation	1M	2M	3M	4M	8M	16M		Median MSE	1M	2M	3M	4M	8M	16M
with cancer	0.379269	0.60385	0.689266	0.719938	0.781281	0.810956		with cancer	0.118674	0.080837	0.073673	0.0691698	0.0623968	0.0587683
with other healthy donor	0.549005	0.751828	0.808852	0.834684	0.883525	0.907732		with other healthy donor	0.110634	0.073412	0.065582	0.0653865	0.0606238	0.0623334
with the same sample	0.564295	0.77291	0.843764	0.875664	0.9198	0.947198		with the same sample	0.106661	0.0672654	0.0606051	0.0583953	0.0534114	0.0510397
Figure S4E
Median Correlation	1M	2M	3M	4M	8M	16M		Median MSE	1M	2M	3M	4M	8M	16M
with cancer	0.90978	0.932992	0.945156	0.944713	0.950133	0.484491		with cancer	0.0424622	0.0373464	0.0355929	0.0370971	0.0324073	0.154325
with other healthy donor	0.909751	0.933058	0.948028	0.943769	0.949743	0.451396		with other healthy donor	0.0419792	0.0369357	0.0363743	0.0369653	0.0323946	0.155851
with the same sample	0.908761	0.933206	0.947666	0.94398	0.949712	0.451396		with the same sample	0.0420404	0.0374613	0.0363311	0.0369092	0.0326194	0.155851

## Sheet: Figure S7
Figure S7A
	Raw	Permutation1	Permutation2	Permutation3	Permutation4	Permutation5	Permutation6	Permutation7	Permutation8	Permutation9	Permutation10
[0.5,0.6]	0.974	0.986	0.987	0.985	0.987	0.985	0.986	0.986	0.985	0.986	0.986
(0.6,0.7]	0.026	0.014	0.013	0.015	0.013	0.015	0.014	0.014	0.015	0.014	0.014
(0.7,0.8]	0	0	0	0	0	0	0	0	0	0	0
(0.8,0.9]	0	0	0	0	0	0	0	0	0	0	0
(0.9,1]	0	0	0	0	0	0	0	0	0	0	0
Figure S7B
	AECT	Permutation1	Permutation2	Permutation3	Permutation4	Permutation5	Permutation6	Permutation7	Permutation8	Permutation9	Permutation10
[0.5,0.6]	0.823	0.996	0.979	0.974	0.991	0.994	0.993	0.996	0.979	0.994	0.993
(0.6,0.7]	0.175	0.004	0.021	0.026	0.009	0.006	0.007	0.004	0.021	0.006	0.007
(0.7,0.8]	0.002	0	0	0	0	0	0	0	0	0	0
(0.8,0.9]	0	0	0	0	0	0	0	0	0	0	0
(0.9,1]	0	0	0	0	0	0	0	0	0	0	0

## Sheet: Figure S9
Figure S9A
	Raw	Permutation1	Permutation2	Permutation3	Permutation4	Permutation5	Permutation6	Permutation7	Permutation8	Permutation9	Permutation10
[0.5,0.6]	0.967	0.979	0.98	0.98	0.979	0.98	0.98	0.98	0.979	0.98	0.979
(0.6,0.7]	0.033	0.021	0.02	0.02	0.021	0.02	0.02	0.02	0.021	0.02	0.021
(0.7,0.8]	0	0	0	0	0	0	0	0	0	0	0
(0.8,0.9]	0	0	0	0	0	0	0	0	0	0	0
(0.9,1]	0	0	0	0	0	0	0	0	0	0	0
Figure S9B
	AECT	Permutation1	Permutation2	Permutation3	Permutation4	Permutation5	Permutation6	Permutation7	Permutation8	Permutation9	Permutation10
[0.5,0.6]	0.904	0.971	0.948	0.984	0.962	0.998	0.997	0.949	0.963	0.972	0.967
(0.6,0.7]	0.096	0.029	0.052	0.016	0.038	0.002	0.003	0.051	0.037	0.028	0.033
(0.7,0.8]	0	0	0	0	0	0	0	0	0	0	0
(0.8,0.9]	0	0	0	0	0	0	0	0	0	0	0
(0.9,1]	0	0	0	0	0	0	0	0	0	0	0
